# Supplementary material
Source: Springer Nature journal article supplement (https://www.springermedizin.de/resource/supplementary/12933_2010_282_MOESM3_ESM.pdf/9540010)

## Diastolic Function

■ LVDD  
■ Normal

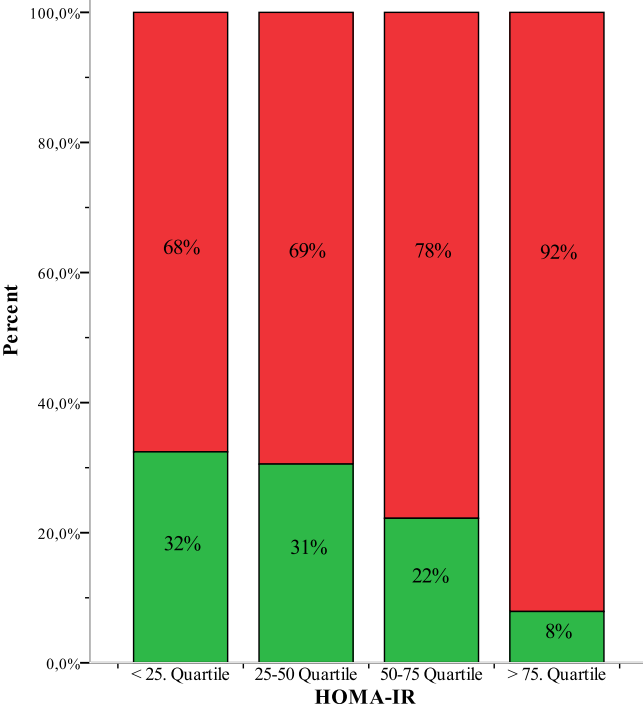

Supplement: MOESM3 [file 9540010]
